# Supplementary material for: High-resolution aCGH and expression profiling identifies a novel genomic subtype of ER negative breast cancer
Source: PubMed Central journal article supplement (PMC2246289; doi:10.1186/gb-2007-8-10-r215), 2007-10-07
Supplement: gb-2007-8-10-r215-S11.pdf [file gb-2007-8-10-r215-S11.pdf]

## Supplementary File S1 - Tables of alteration for selected gene sets and gene families

### *CAN-genes*

Breast cancer CAN-genes with significant gains or losses and showing significant up or downregulation of expression. Columns label the chromosome (CHR), the frequency of gain and loss (Freq.Gain & Freq.Loss), whether the expression association (Expr) is between copy-number gain and overexpression (G) or copy-number loss and underexpression (L), and the p-value of significance as determined by the Wilcoxon rank sum test (pval).

| Name     | CHR | Freq.Gain | Freq.Loss | Expr | pval        |
|----------|-----|-----------|-----------|------|-------------|
| ABCB10   | 1   | 0.56725   | 0.0117    | G    | $< 10^{-4}$ |
| NCOA6    | 20  | 0.26316   | 0.00585   | G    | $< 10^{-4}$ |
| NUP133   | 1   | 0.56725   | 0.0117    | G    | $< 10^{-4}$ |
| OBSCN    | 1   | 0.54678   | 0.0117    | G    | $< 10^{-4}$ |
| PPM1E    | 17  | 0.19298   | 0.05263   | G    | 0.06        |
| C22orf19 | 22  | 0.05848   | 0.19298   | L    | 0.0006      |
| DDX10    | 11  | 0.04678   | 0.22807   | L    | 0.001       |
| GGA1     | 22  | 0.06433   | 0.22807   | L    | 0.06        |
| SORL1    | 11  | 0.04094   | 0.22807   | L    | 0.04        |

### *The phosphatome*

Phosphatases with significant gains or losses and showing significant up or downregulation of expression. Columns label the chromosome (CHR), the frequency of gain and loss (Freq.Gain & Freq.Loss), whether the expression association (Expr) is between copy-number gain and overexpression (G) or copy-number loss and underexpression (L), and the p-value of significance as determined by the Wilcoxon rank sum test (pval).

| Name   | CHR | Freq.Gain | Freq.Loss | Expr | pval   |
|--------|-----|-----------|-----------|------|--------|
| PTPRA  | 20  | 0.22807   | 0.02339   | G    | 0.003  |
| PTPRC  | 1   | 0.54971   | 0         | G    | 0.09   |
| DUSP10 | 1   | 0.55556   | 0         | G    | 0.098  |
| DUSP12 | 1   | 0.55556   | 0.00585   | G    | 0.0002 |
| DUSP15 | 20  | 0.25146   | 0.00585   | G    | 0.008  |
| PTP4A3 | 8   | 0.45029   | 0.07018   | G    | 0.08   |
| MTMR4  | 17  | 0.18713   | 0.05263   | G    | 0.06   |
| PTPRK  | 6   | 0.09357   | 0.15497   | L    | 0.02   |
| MTMR2  | 11  | 0.07018   | 0.19883   | L    | 0.02   |
| EYA4   | 6   | 0.08772   | 0.15205   | L    | 0.05   |

### *Histones and Chromatin Modifiers*

Histones and chromatin modifiers with significant gains or losses and showing significant up or downregulation of expression. Columns label the chromosome (CHR), the frequency of gain and loss (Freq.Gain & Freq.Loss), whether the expression association (Expr) is between copy-number gain and overexpression (G) or copy-number loss and underexpression (L), and the p-value of significance as determined by the Wilcoxon rank sum test (pval). Abbreviations: histone methyltransferase (HMT), helicase (HELIC), histone acetyltransferase (HAT), histone deacetyltransferase (HDAC), histone (HIST), histone demethyltransferase (HDMT), bromodomain associated (BROM.DOM), chromatin assembly (CHROM.ASSEM.), chromatin domain associated (CHROM.DOM).

| Name             | Type           | CHR | Freq.Gain | Freq.Loss | Expr  | pval               |
|------------------|----------------|-----|-----------|-----------|-------|--------------------|
| ARID4B           | HDMT           | 1   | 0.55166   | 0.0078    | G     | $< 10^{-4}$        |
| ADA              |                | 20  | 0.26901   | 0.01754   | G     | 0.03               |
| ASH2L            | HMT            | 8   | 0.31579   | 0.14035   | G (L) | $< 10^{-5}$ (0.04) |
| CHAF1B           |                | 21  | 0.10526   | 0.08187   | G     | $< 10^{-4}$        |
| CHD1L / POLR3C   | HELIC          | 1   | 0.49269   | 0.00731   | G     | 0.02               |
| CHRAC1           |                | 8   | 0.50292   | 0.04094   | G     | 0.08               |
| CREBBP           | HAT            | 16  | 0.33333   | 0.07018   | G     | 0.03               |
| DNMT3B           |                | 20  | 0.24561   | 0.0117    | G     | 0.006              |
| FBXO18           | HELIC          | 10  | 0.20468   | 0.01754   | G     | 0.05               |
| FKBP1A           |                | 20  | 0.23392   | 0.02339   | G     | 0.08               |
| H2AFV            |                | 7   | 0.12865   | 0.04094   | G     | 0.006              |
| H3F3B            |                | 17  | 0.16959   | 0.11111   | G     | $< 10^{-5}$        |
| HDAC2            | HDAC           | 6   | 0.09357   | 0.1462    | G (L) | 0.0001 (0.04)      |
| HIST1H1B         | HIST           | 6   | 0.12865   | 0.02924   | G     | 0.009              |
| HIST1H1D         | HIST           | 6   | 0.1345    | 0.02924   | G     | 0.07               |
| HIST1H2BD        | HIST           | 6   | 0.1345    | 0.02924   | G     | 0.09               |
| HIST1H2BE        | HIST           | 6   | 0.1345    | 0.02924   | G     | 0.01               |
| HIST1H2BI        | HIST           | 6   | 0.1345    | 0.02339   | G     | 0.05               |
| HIST1H3C         | HIST           | 6   | 0.1345    | 0.02924   | G     | 0.04               |
| HIST2H2AA        | HIST           | 1   | 0.52047   | 0.00585   | G     | $< 0.1$            |
| HIST2H4          | HIST           | 1   | 0.51901   | 0.01901   | G     | $< 10^{-4}$        |
| JARID1B / CYB5R1 | HDMT           | 1   | 0.57018   | 0.00877   | G     | 0.0003             |
| JMJD1B           | HDMT           | 5   | 0.10526   | 0.07602   | G     | 0.06               |
| L3MBTL           |                | 20  | 0.26316   | 0.02924   | G     | 0.005              |
| MYST1            | HAT            | 16  | 0.19883   | 0.20468   | G     | 0.05               |
| PARP1            |                | 1   | 0.55556   | 0         | G     | $< 10^{-5}$        |
| RBBP6            |                | 16  | 0.36842   | 0.03509   | G     | 0.03               |
| SETDB1           | HMT            | 1   | 0.53216   | 0.0117    | G     | 0.003              |
| SMYD3            | HMT            | 1   | 0.5731    | 0.01754   | G     | 0.09               |
| SUV39H2          | HMT            | 10  | 0.21053   | 0.01754   | G     | $< 10^{-5}$        |
| THEX1            |                | 8   | 0.1345    | 0.24561   | G     | 0.08               |
| THRAP4           |                | 17  | 0.16374   | 0.07018   | G     | 0.0001             |
| UBE2D2           |                | 5   | 0.11111   | 0.07602   | G     | 0.01               |
| UBE2V2           |                | 8   | 0.35673   | 0.04094   | G     | $< 10^{-4}$        |
| WHSC1L1          | HMT            | 8   | 0.32164   | 0.12865   | G     | 0.0007             |
| BRD1             | BROM.DOM       | 22  | 0.05848   | 0.23392   | L     | 0.04               |
| CHAF1A           | CHROM.ASSEM.   | 19  | 0.04094   | 0.11696   | L     | 0.05               |
| CHD9             | CHROM.DOM      | 16  | 0.07018   | 0.34795   | L     | 0.01               |
| EP300            | HAT            | 22  | 0.06433   | 0.22807   | L     | 0.03               |
| H1FO             | HIST           | 22  | 0.07018   | 0.22807   | L     | 0.03               |
| MBD2             |                | 18  | 0.07602   | 0.14035   | L     | 0.0004             |
| MIZF             | MBD2-interact. | 11  | 0.03509   | 0.24561   | L     | 0.005              |
| MLL              | HMT            | 11  | 0.04094   | 0.23977   | L     | 0.09               |
| NCOR1 / TTC19    | HDAC-complex   | 17  | 0.02924   | 0.25146   | L     | $< 10^{-4}$        |
| NHP2L1           |                | 22  | 0.05848   | 0.22807   | L     | 0.01               |
| PRMT7            | HMT            | 16  | 0.02924   | 0.4386    | L     | 0.0002             |
| SAP18            | HDAC-complex   | 13  | 0.05263   | 0.16959   | L     | 0.0004             |
| SIRT3            | HDAC           | 11  | 0.02924   | 0.15205   | L     | 0.002              |
| SLBP             |                | 4   | 0.07018   | 0.14035   | L     | 0.07               |
| UBE2G1           |                | 17  | 0.04094   | 0.2807    | L     | 0.002              |
| UBE2L3           |                | 22  | 0.07018   | 0.21637   | L     | 0.002              |

### The Kinome

Kinases with significant gains or losses and showing significant up or downregulation of expression. Columns label the chromosome (CHR), the frequency of gain and loss (Freq.Gain & Freq.Loss), whether the expression association (Expr) is between copy-number gain and overexpression (G) or copy-number loss and underexpression (L), and the p-value of significance as determined by the Wilcoxon rank sum test (pval).

| Name       | CHR | Freq.Gain | Freq.Loss | Expr | pval        |
|------------|-----|-----------|-----------|------|-------------|
| ATR        | 3   | 0.18713   | 0.02339   | G    | 0.002       |
| CDK5       | 7   | 0.12281   | 0.06433   | G    | 0.09        |
| CLK2       | 1   | 0.50292   | 0.02924   | G    | $< 10^{-4}$ |
| HER2/ERBB2 | 17  | 0.27485   | 0.07018   | G    | $< 10^{-5}$ |
| GSK3B      | 3   | 0.16959   | 0.02339   | G    | 0.08        |
| LIMK1      | 7   | 0.15789   | 0.05263   | G    | 0.03        |
| MARK1      | 1   | 0.55556   | 0         | G    | 0.08        |
| PHKG1      | 7   | 0.1345    | 0.02339   | G    | 0.04        |
| TRIO       | 5   | 0.21053   | 0.02924   | G    | 0.02        |
| DYRK3      | 1   | 0.5731    | 0         | G    | 0.06        |
| RIPK2      | 8   | 0.48538   | 0.01754   | G    | $< 10^{-4}$ |
| MAPKAPK2   | 1   | 0.5731    | 0         | G    | 0.008       |
| SGK2       | 20  | 0.26316   | 0.02924   | G    | 0.005       |
| BCKDK      | 16  | 0.19298   | 0.20468   | G    | 0.07        |
| TLK2       | 17  | 0.23977   | 0.03509   | G    | 0.02        |
| ZC2/TNIK   | 3   | 0.15497   | 0.02924   | G    | 0.003       |
| SGK3       | 8   | 0.42105   | 0.01754   | G    | 0.04        |
| PIK3R4     | 3   | 0.15789   | 0.01754   | G    | 0.01        |
| CDKL3      | 5   | 0.11111   | 0.10526   | G    | 0.001       |
| PBK        | 8   | 0.12865   | 0.27485   | G    | 0.01        |
| SCYL3      | 1   | 0.54971   | 0.00585   | G    | $< 10^{-4}$ |
| OBSCN      | 1   | 0.54678   | 0.0117    | G    | $< 10^{-4}$ |
| NEK7       | 1   | 0.54386   | 0.00585   | G    | 0.09        |
| ILK        | 11  | 0.02924   | 0.12865   | L    | 0.03        |
| NEK3       | 13  | 0.02924   | 0.21053   | L    | 0.002       |
| MAP2K4     | 17  | 0.02339   | 0.26901   | L    | 0.0001      |
| TESK1      | 9   | 0.08772   | 0.10526   | L    | 0.004       |
| RIOK3      | 18  | 0.07602   | 0.12281   | L    | 0.07        |
| STK33      | 11  | 0.02924   | 0.12281   | L    | 0.04        |
| MLKL       | 16  | 0.04094   | 0.4386    | L    | 0.005       |
| PIM3       | 22  | 0.05848   | 0.24561   | L    | 0.03        |
| ULK3       | 15  | 0.05848   | 0.09357   | L    | 0.06        |
