# Supplementary material for: High-resolution aCGH and expression profiling identifies a novel genomic subtype of ER negative breast cancer
Source: PubMed Central journal article supplement (PMC2246289; doi:10.1186/gb-2007-8-10-r215), 2007-10-07

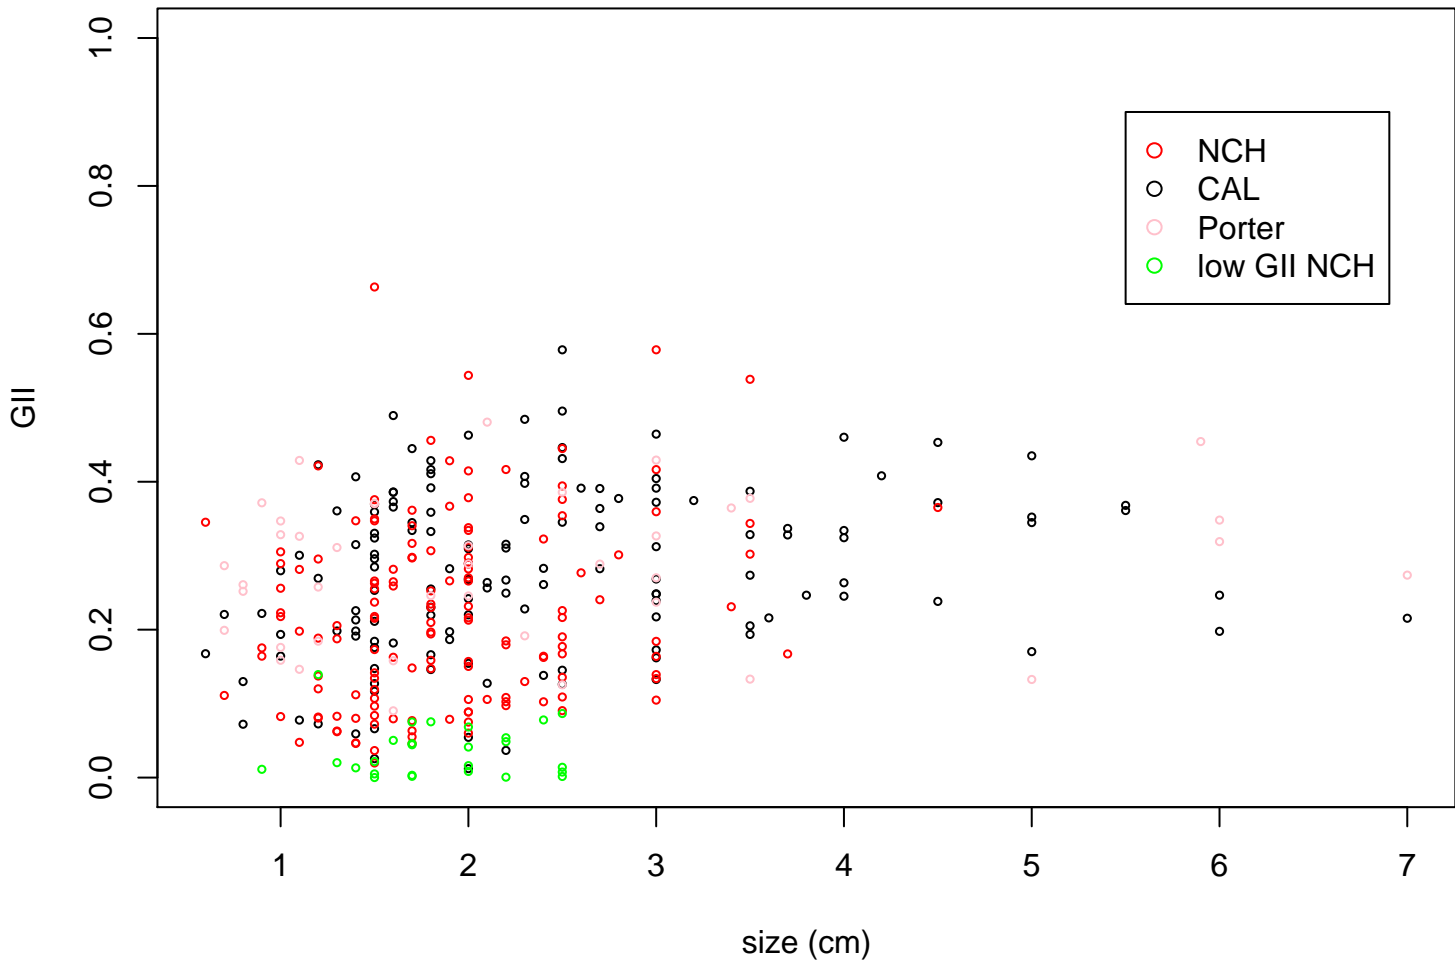

Supplement: gb-2007-8-10-r215-S12.pdf [file gb-2007-8-10-r215-S12.pdf]
